# Supplementary material
Source: PubMed Central journal article supplement (PMC533052)
Supplement: 7600466s2.pdf [file 7600466s2.pdf]

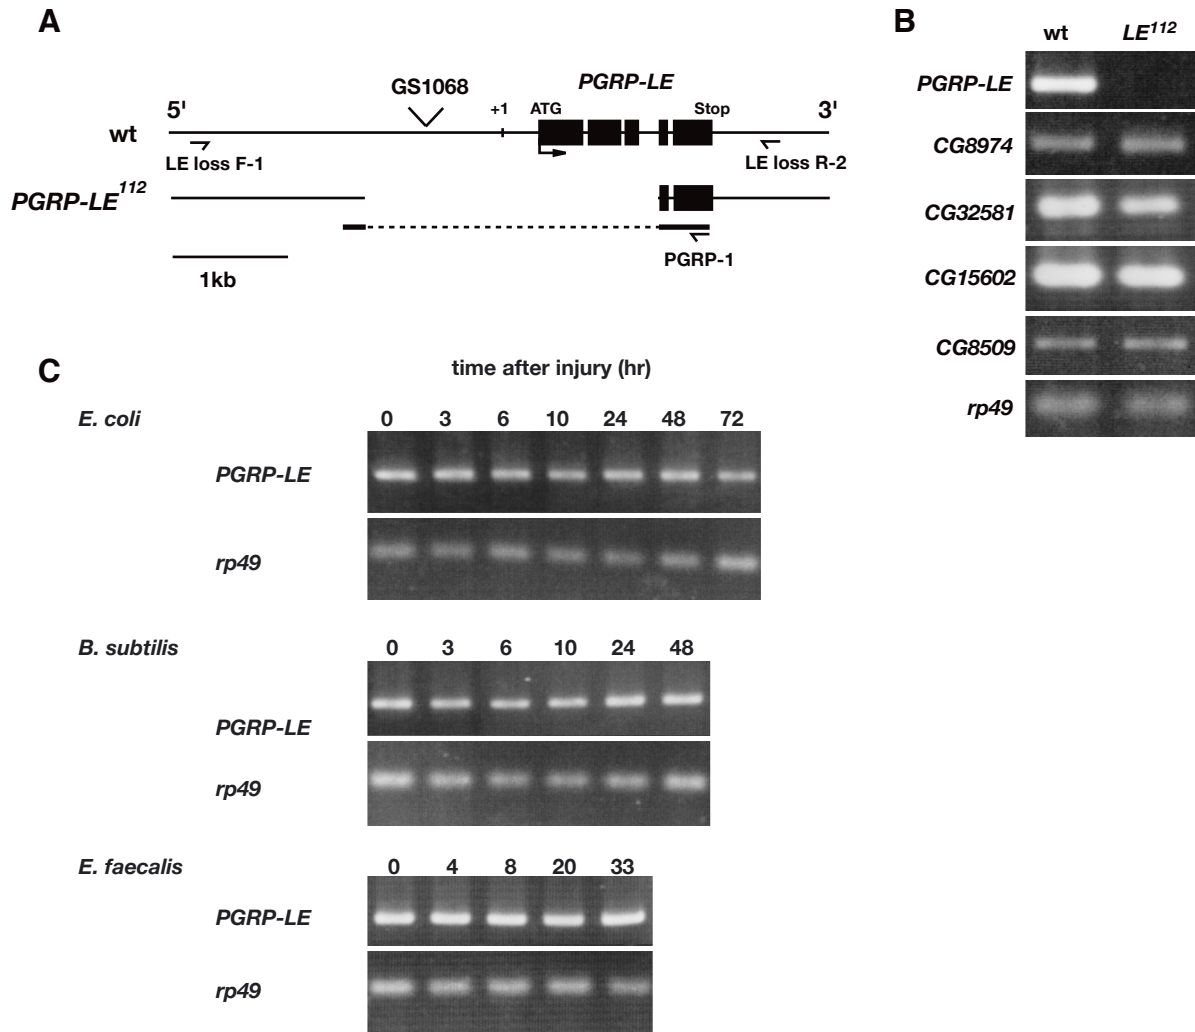

## Legend for supplementary figure 1

### Supplementary Figure 1. Generation of a *PGRP-LE* mutant

(A) Schematic representation of the genomic regions of *PGRP-LE*. The black boxes represent the *PGRP-LE* ORF. The start codon, direction of transcription, the stop codon, and the insertion site of the P element GS 1068 are indicated. The bold line and the broken line represent the sequenced genomic PCR fragment of *PGRP-LE*<sup>112</sup> and the deletion, respectively.

(B) Expression of *PGRP-LE* and the neighboring genes, *CG8974*, *CG32581*, *CG15602*, and *CG 8509*. RT-PCR was performed with wild-type larvae (wt) and *PGRP-LE*<sup>112</sup>. *rp49* was used as an internal control. (C) Expression of *PGRP-LE* after bacterial challenge. RT-PCR was performed with wild-type adults after *E. coli*, *B. subtilis*, and *E. faecalis* infections. *rp49* was used as an internal control.
